# Supplementary material for: MBDDiff: an R package designed specifically for processing MBDcap-seq datasets
Source: PubMed Central journal article supplement (PMC5001203; doi:10.1186/s12864-016-2794-z), 2016-08-18
Supplement: 12864_2016_2794_MOESM1_ESM.pdf [file 12864_2016_2794_MOESM1_ESM.pdf]

# Model-based and context-specific background correction and differential methylation testing for MBDCap-seq

Yuanhang Liu<sup>1,2</sup>, Desiree Wilson<sup>2</sup>, Robin J. Leach<sup>2,3</sup>, Yidong Chen<sup>1,4,§</sup>

## Supplementary Figures

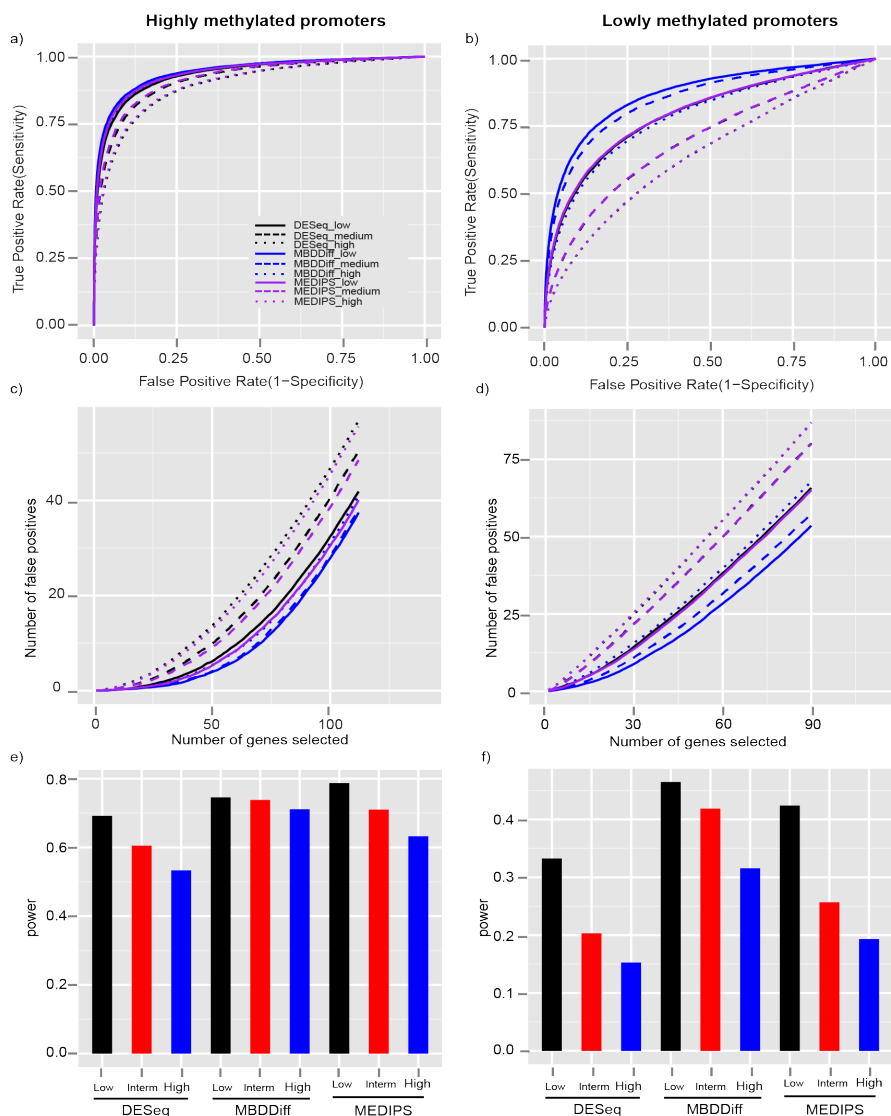

**Figure S1.** ROC, false discovery curve, power bar plot with highly methylated promoters (>75% quantile) and lowly methylated promoters (<25% quantile) with 6 number of replicates in each condition. Simulation was carried out 100 times and average values were used.

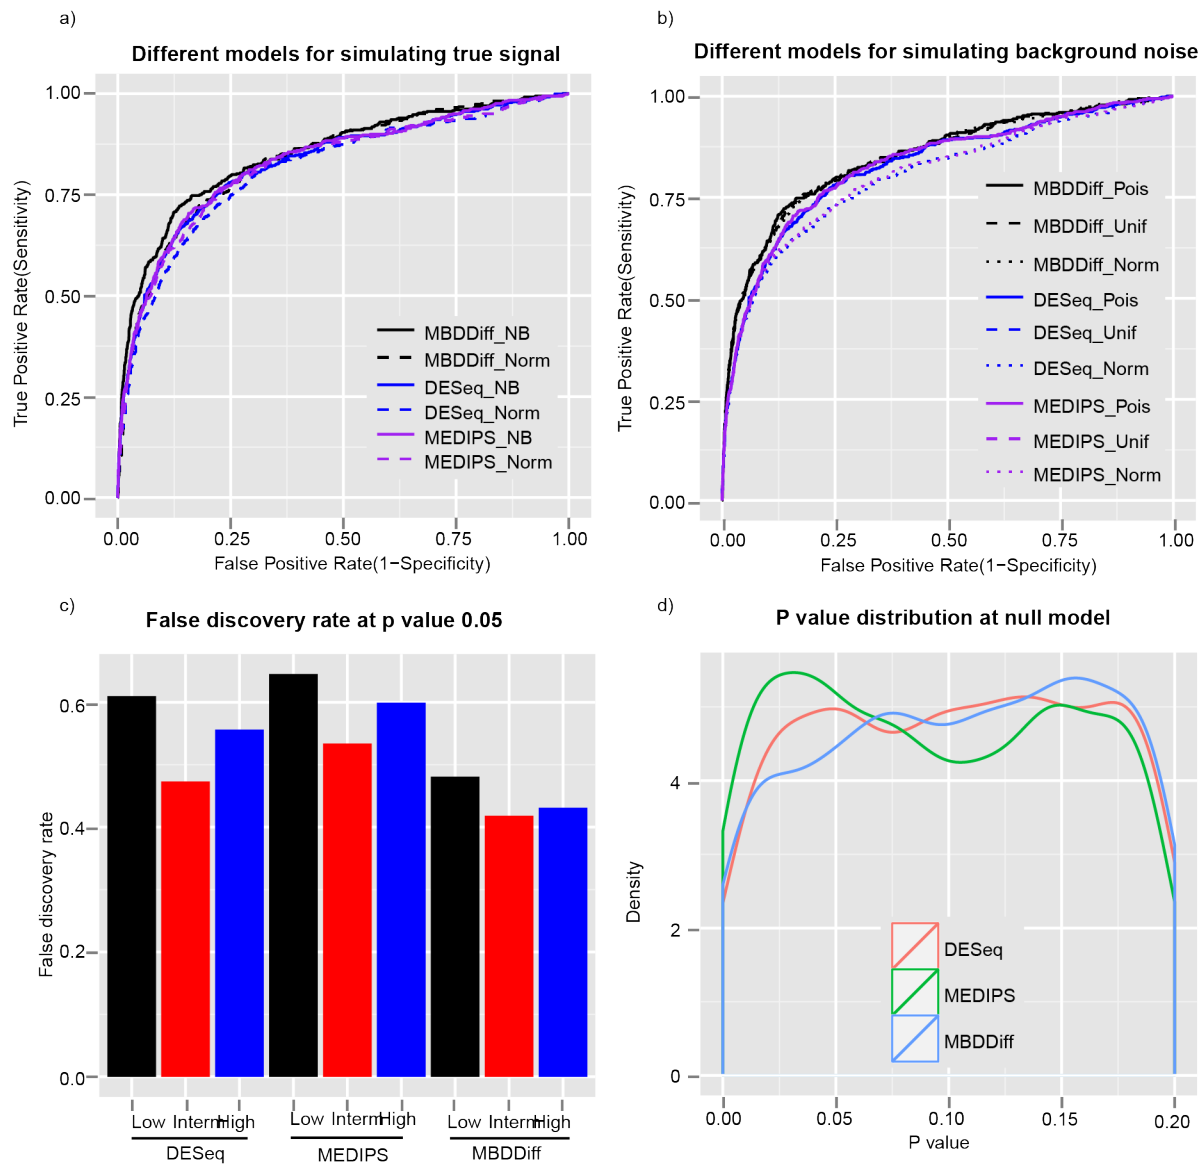

**Figure S2.** (a) ROC curves regarding simulation of true signal based on different statistical distributions, including normal and negative binomial distribution (b) ROC curves regarding simulation of background noise based on different statistical distributions, including Poisson, uniform and normal distribution. (c) False discovery rate at preset threshold with  $p$  value equals to 0.05 (d) The  $p$  value distributions under null model distribution (without differentially methylated promoters).

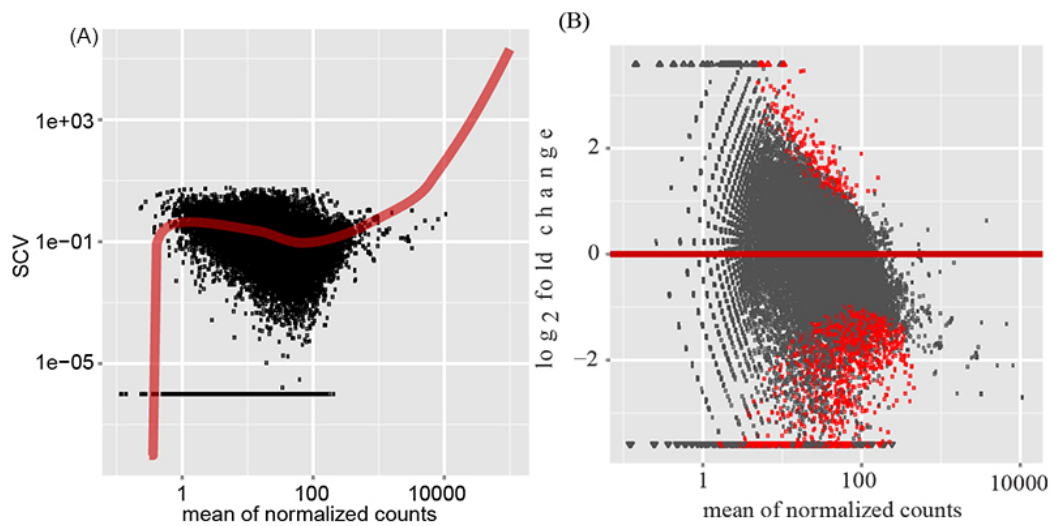

Figure S3 **Differential methylation analysis of TNBCs.** (A) Plot of dispersion versus mean of normalized counts; (B) Log<sub>2</sub> fold change versus mean of normalized counts, red dots indicate differentially methylated promoters with  $p$ -value smaller than 0.01, absolute log<sub>2</sub> fold change larger than 1.

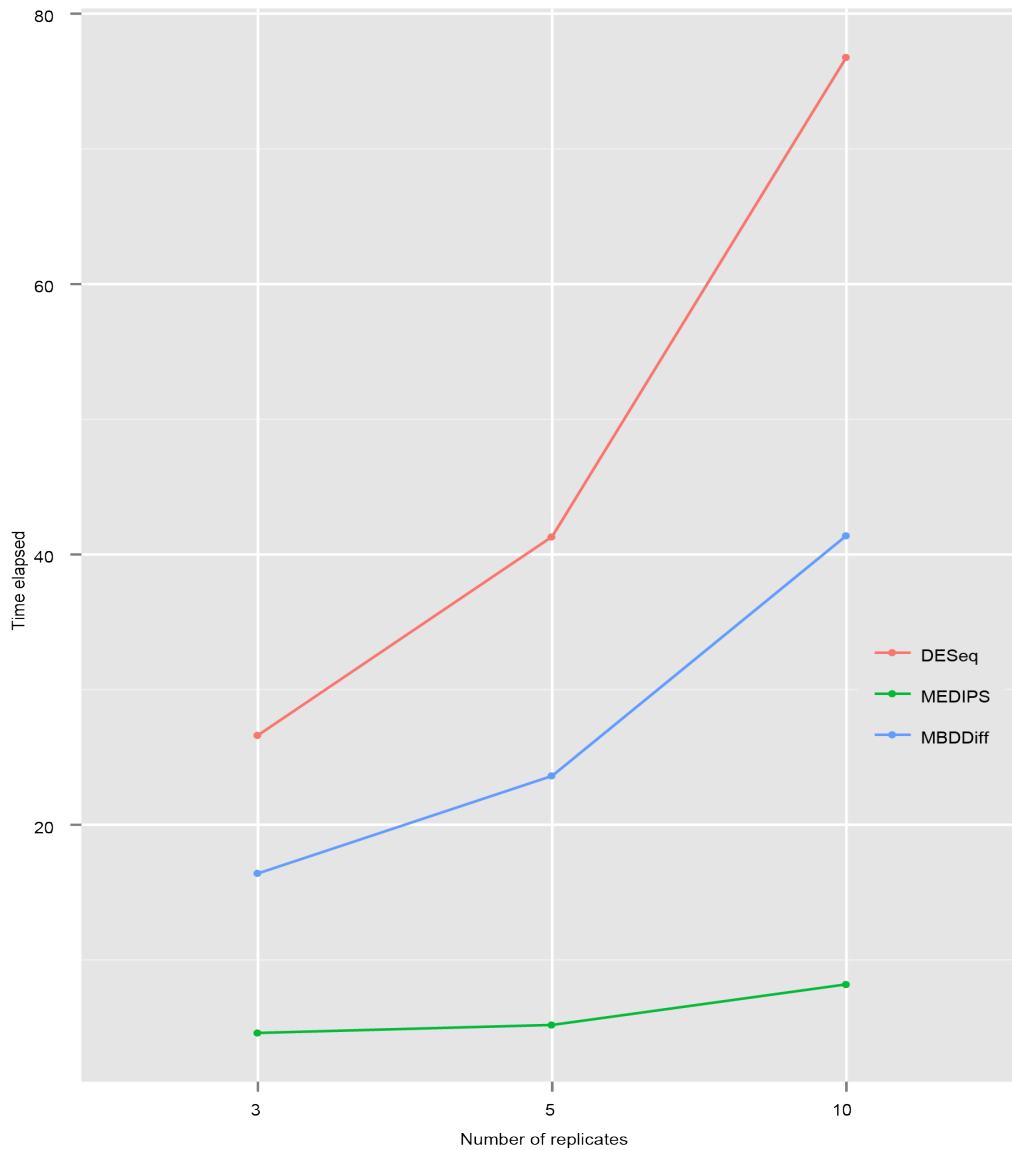

**Figure S4.** Execution time of different statistical methods with 3, 5, and 10 replicates in 2 conditions with relatively low background noise with three number of replicates (test vs control). The comparison was performed on red hat enterprise linux server release 6.3 with 80 CPUs of 1994.866 MHz.

## Supplementary tables

| # of samples/group      |         | DESeq |        |      | MBDDiff |        |      | MEDIPS |        |      |
|-------------------------|---------|-------|--------|------|---------|--------|------|--------|--------|------|
|                         |         | Low   | Interm | High | Low     | Interm | High | Low    | Interm | High |
| 3 replicates<br>10% DMP | AUC     | 0.80  | 0.74   | 0.70 | 0.84    | 0.84   | 0.80 | 0.81   | 0.75   | 0.71 |
|                         | # of FD | 279   | 320    | 344  | 248     | 255    | 279  | 271    | 314    | 340  |
|                         | Power   | 0.34  | 0.25   | 0.20 | 0.41    | 0.40   | 0.34 | 0.45   | 0.33   | 0.27 |
|                         |         |       |        |      |         |        |      |        |        |      |
| 3 replicates<br>30% DMP | AUC     | 0.81  | 0.74   | 0.70 | 0.84    | 0.84   | 0.80 | 0.81   | 0.75   | 0.71 |
|                         | # of FD | 554   | 656    | 727  | 479     | 494    | 551  | 538    | 645    | 719  |
|                         | Power   | 0.34  | 0.25   | 0.20 | 0.41    | 0.39   | 0.34 | 0.45   | 0.33   | 0.27 |
|                         |         |       |        |      |         |        |      |        |        |      |
| 6 replicates<br>10% DMP | AUC     | 0.91  | 0.85   | 0.81 | 0.94    | 0.93   | 0.91 | 0.91   | 0.85   | 0.81 |
|                         | # of FD | 179   | 230    | 266  | 147     | 154    | 179  | 175    | 226    | 264  |
|                         | Power   | 0.62  | 0.48   | 0.39 | 0.71    | 0.69   | 0.62 | 0.71   | 0.56   | 0.46 |
|                         |         |       |        |      |         |        |      |        |        |      |
| 6 replicates<br>30% DMP | AUC     | 0.91  | 0.85   | 0.81 | 0.94    | 0.93   | 0.91 | 0.91   | 0.85   | 0.81 |
|                         | # of FD | 346   | 455    | 541  | 280     | 294    | 348  | 338    | 451    | 538  |
|                         | Power   | 0.61  | 0.48   | 0.38 | 0.70    | 0.68   | 0.62 | 0.70   | 0.56   | 0.46 |

**Table1.** Values of AUC, number of false discoveries, statistical power for DESeq, MBDDiff and MEDIPS in various conditions with fold change equals to 2, 3 or 6 number of replicates per test group, 10% or 30% number of DM promoters

|                         |         | DESeq |        |      | MBDDiff |        |      | MEDIPS |        |      |
|-------------------------|---------|-------|--------|------|---------|--------|------|--------|--------|------|
| # of samples/group      |         | Low   | Interm | High | Low     | Interm | High | Low    | Interm | High |
| 3 replicates<br>10% DMP | AUC     | 0.92  | 0.88   | 0.83 | 0.95    | 0.95   | 0.92 | 0.93   | 0.88   | 0.84 |
|                         | # of FD | 166   | 214    | 247  | 134     | 141    | 164  | 149    | 200    | 236  |
|                         | Power   | 0.65  | 0.52   | 0.43 | 0.74    | 0.72   | 0.66 | 0.77   | 0.63   | 0.53 |
|                         |         |       |        |      |         |        |      |        |        |      |
| 3 replicates<br>30% DMP | AUC     | 0.92  | 0.88   | 0.84 | 0.95    | 0.95   | 0.92 | 0.93   | 0.88   | 0.84 |
|                         | # of FD | 310   | 411    | 491  | 242     | 256    | 309  | 282    | 390    | 473  |
|                         | Power   | 0.64  | 0.51   | 0.43 | 0.73    | 0.72   | 0.66 | 0.77   | 0.63   | 0.53 |
|                         |         |       |        |      |         |        |      |        |        |      |
| 6 replicates<br>10% DMP | AUC     | 0.98  | 0.95   | 0.92 | 0.99    | 0.99   | 0.98 | 0.98   | 0.95   | 0.92 |
|                         | # of FD | 82    | 119    | 151  | 59      | 64     | 82   | 73     | 113    | 148  |
|                         | Power   | 0.88  | 0.79   | 0.71 | 0.93    | 0.92   | 0.88 | 0.93   | 0.84   | 0.76 |
|                         |         |       |        |      |         |        |      |        |        |      |
| 6 replicates<br>30% DMP | AUC     | 0.98  | 0.95   | 0.92 | 0.99    | 0.99   | 0.98 | 0.99   | 0.95   | 0.92 |
|                         | # of FD | 151   | 230    | 299  | 101     | 113    | 150  | 139    | 226    | 296  |
|                         | Power   | 0.88  | 0.78   | 0.70 | 0.93    | 0.92   | 0.88 | 0.92   | 0.84   | 0.76 |

**Table2.** Values of AUC, number of false discoveries, statistical power for DESeq, MBDDiff and MEDIPS in various conditions with fold change equals to 3, 3 or 6 number of replicates per test group, 10% or 30% number of DM promoters

|                   | MBDDiff | MEDIPS | DESeq |
|-------------------|---------|--------|-------|
| Negative Binomial | 0.85    | 0.83   | 0.83  |
| Normal            | 0.84    | 0.81   | 0.82  |

**Table3.** Values of AUC, for simulation of true signal based on different models

|         | MBDDiff | MEDIPS | DESeq |
|---------|---------|--------|-------|
| Poisson | 0.85    | 0.83   | 0.83  |
| Normal  | 0.85    | 0.83   | 0.83  |
| Uniform | 0.85    | 0.80   | 0.81  |

**Table4.** Values of AUC, for simulation of background noise based on different models
